# Supplementary material
Source: publisher site journal article supplement (https://www.dovepress.com/article/398913)
Supplement: Supplementary file 1 [file get_supplementary_file.php]

**Table S1.** Antimicrobial resistance susceptibility of *Enterococcus faecium* SJ2.

| **Antibiotic** | **MIC** | **Interpret** |
| --- | --- | --- |
| Gentamicin high level (synergy) | SYN-S | S |
| Streptomycin high level (synergy) | SYN-R | R |
| Benzylpenicillin | ≥ 64 | R |
| Ampicillin | ≥ 32 | R |
| Ciprofloxacin | ≥ 8 | R |
| Levofloxacin | ≥ 8 | R |
| Erythromycin | ≥ 8 | R |
| Quinupristin/dalfopristin | 0.5 | S |
| Linezolid | 1 | S |
| Vancomycin | ≥ 32 | R |
| Tetracycline | ≤ 1 | S |
| Tigecycline | ≤ 0.12 | S |
| Nitrofurantoin | 64 | I |

**Table S2.** Characteristics of ARGs and virulence determinants carried by *Enterococcus faecium* SJ2.

|  | **Gene** |
| --- | --- |
| **Antimicrobial agents** |  |
| Streptogramin | *msr* |
|  | *erm* |
| Aminoglycosides | *ant(6)-Ia* |
|  | *aph(3')-III* |
| Glycopeptides | *vanA* |
|  | *vanX* |
|  | *vanH* |
| **Virulence determinants (function)** |  |
| Collagen-binding adhesin | *acm* |
| Cell wall adhesin | *efaAfm* |
| Hyaluronidase | *hylEfm* |
| *Enterococcal* surface protein | *espfm* |
